# Supplementary material for: Controllable integration of ultrasmall noble metal nanoparticles into mesoporous silica matrixes by a self-assembly method
Source: Royal Society of Chemistry journal article supplement (doi:10.1039/c8cc03236j), 2018-01-01
Supplement: c8cc03236j1.pdf [file c8cc03236j1.pdf]

## *Electronic Supplementary Information*

# **Controllable integration of ultrasmall noble metal nanoparticles into mesoporous silica matrixes by a self-assembly method**

Bo Sun, Tingjun Fu, and Hua Chun Zeng \*

*Department of Chemical and Biomolecular Engineering, Faculty of Engineering, National University of Singapore, 10 Kent Ridge Crescent, Singapore 119260*

\*Email: chezhc@nus.edu.sg

### **Table of Contents**

|                       |           |
|-----------------------|-----------|
| Experimental Section  | Pages 2-3 |
| Supplementary Figures | Pages 4-9 |
| Supplementary Tables  | Page 10   |
| References            | Page 10   |

## Experimental Section

### Materials and reagents

The following chemicals were used as received without any further purification: absolute ethanol (Fisher, analytical reagent grade), tetraethyl orthosilicate (TEOS, Aldrich,  $\geq 99.0\%$ ), hexadecyltrimethylammonium chloride solution (CTACl, 25 wt.% in H<sub>2</sub>O, Sigma-Aldrich), ammonia solution (Merck,  $\sim 35\%$ ), ethylene glycol (C<sub>2</sub>H<sub>6</sub>O<sub>2</sub>,  $\geq 99.5\%$ , Merck), ruthenium chloride hydrate (RuCl<sub>3</sub>·xH<sub>2</sub>O, Sigma-Aldrich, reagentplus), chloroplatinic acid hydrate (H<sub>2</sub>PtCl<sub>6</sub>·xH<sub>2</sub>O, Sigma-Aldrich), Rhodium (II) acetate dimer (Rh<sub>2</sub>(OOCCH<sub>3</sub>)<sub>4</sub>, 99.99%, Sigma-Aldrich). Deionized water was generated by Elga Micromeg Purified Water system.

### Preparation of Pt (~1 nm) nanoparticles

Pt nanoparticles were synthesized by a polyol reduction method according to the literature.<sup>1,2</sup> Typically, NaOH (5 mL, 0.5 M) in ethylene glycol was added to a solution of H<sub>2</sub>PtCl<sub>6</sub>·xH<sub>2</sub>O in 5 mL of ethylene glycol. The Pt concentration was 0.5 mM. The mixture was heated at 433 K for 3 h under N<sub>2</sub> flow. After the reaction, the mixture was cooled to room temperature and stored for further use.

### Preparation of Ru (~1 nm) nanoparticles

The procedures were similar to the preparation section of Pt nanoparticles except that RuCl<sub>3</sub>·xH<sub>2</sub>O was used as metal precursor instead.

### Preparation of Rh (~1 nm) nanoparticles

The procedures were similar to the preparation section of Pt nanoparticles except that Rh<sub>2</sub>(OOCCH<sub>3</sub>)<sub>4</sub> was used as metal precursor instead.

### Preparation of Pt-Ru (~1 nm) alloy nanoparticles

The procedures were similar to the preparation section of Pt nanoparticles except that H<sub>2</sub>PtCl<sub>6</sub>·xH<sub>2</sub>O and RuCl<sub>3</sub>·xH<sub>2</sub>O with a molar ratio of 1:1 was used as metal precursors instead.

### Preparation of Pt nanoparticles (4.4 nm)

Pt nanoparticles were synthesized by a reduction method with some modification.<sup>3</sup> 133 mg of PVP was dissolved in a mixture of 20 mL of 6.0 mM H<sub>2</sub>PtCl<sub>6</sub> aqueous solution and 180 mL of methanol. The nanoparticles were obtained after the mixture was refluxed for 3 h at 110 °C.

### Preparation of noble metal integrated mesoporous silica

13 mL of DI water was mixed with 50  $\mu$ L noble metal colloidal suspension, 2 mL of CTACl solution, 1 to 3 mL of ethanol, and 0.1 mL of 1.0 M ammonia solution. The resulting mixture was stirred at room temperature for 30 min. After that, 0.5 mL of TEOS, was added to the above mixture. The mixture was further stirred for another 30 min, followed by heating at 60 °C in an electric oven for 2 h. The final product was collected by centrifuging, washed with ethanol and dried at 60 °C overnight. Then the samples were calcined at 400 °C for 5 h in 30 mL/min of Ar flow.

### **Hydrogenation of CO<sub>2</sub>**

Hydrogenation of CO<sub>2</sub> was carried out in a fixed bed stainless steel reactor (inner diameter = 7 mm, length = 50 cm) loading with 100 mg of the prepared catalysts. Catalyst bed at the center of the reactor was supported by glass wool at both ends, while the remaining space was filled with 2 mm glass beads. Temperature was measured by a type K thermocouple inserted into the reactor and near the catalyst bed. In situ activation was carried out at 400°C for 1 h with a heating rate of 5°C/min under a constant flow of 50 mL/min of H<sub>2</sub>/N<sub>2</sub> (10%/90%) at 1 atm. A gas mixture of H<sub>2</sub> and CO<sub>2</sub> (H<sub>2</sub>:CO<sub>2</sub> = 4:1) at a total flow rate of 20 mL/min was fed into the reactor. The reaction temperature was increased from 100 to 400 °C with 25 °C intervals. Reactants and products were measured online by gas chromatography (GC, Agilent-7890A) coupled with thermal conductivity detector (TCD). Unless otherwise mentioned, all the data were measured at steady state, e.g., after 60 min to 90 min on stream. The data presented at each temperature were the averaged values of three measurements.

### **Characterization techniques**

Morphologies of samples were characterized by scanning electron microscopy (SEM, JEOL-6700F), transmission electron microscopy (TEM, JEM-2010, 200 kV) and high-resolution transmission electron microscopy (HRTEM, JEM-2100F, 200 kV). The crystallographic information was analyzed by X-ray diffraction (XRD, Bruker D8 Advance) equipped with a Cu K<sub>α</sub> radiation source. Specific surface areas and average pore size of samples were determined using N<sub>2</sub> physisorption isotherms at 77 K (Quantachrome NOVA-3000 system). Metal content in the catalysts was determined by inductively coupled plasma optical emission spectrometry (ICP-OES, Optima 7300DV, Perkin Elmer, USA).

Supplementary Figures (Figure S1 to Figure S12)

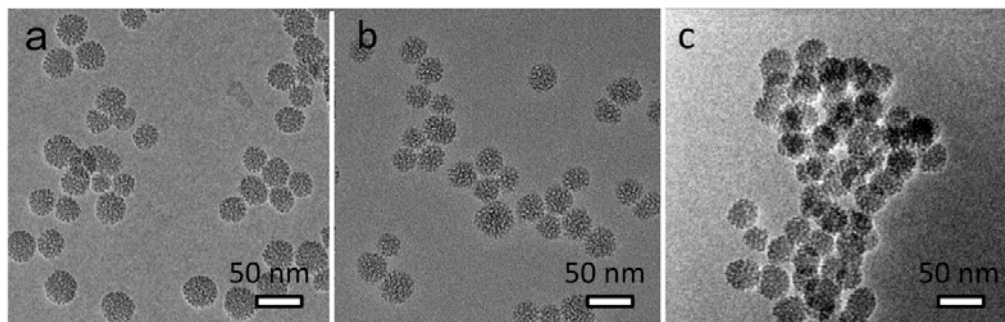

**Figure S1.** TEM images of Pt/*m*SiO<sub>2</sub> using different volumes of Pt colloidal suspension: (a) 10  $\mu$ L, (b) 20  $\mu$ L, and (c) 100  $\mu$ L.

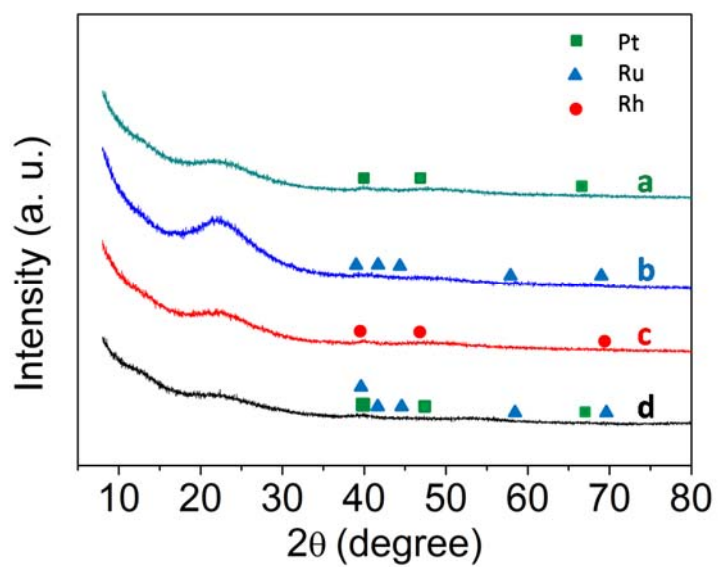

**Figure S2.** XRD patterns of (a) Pt/*m*SiO<sub>2</sub>, (b) Ru/*m*SiO<sub>2</sub>, (c) Rh/*m*SiO<sub>2</sub>, and (d) Pt-Ru/*m*SiO<sub>2</sub>.

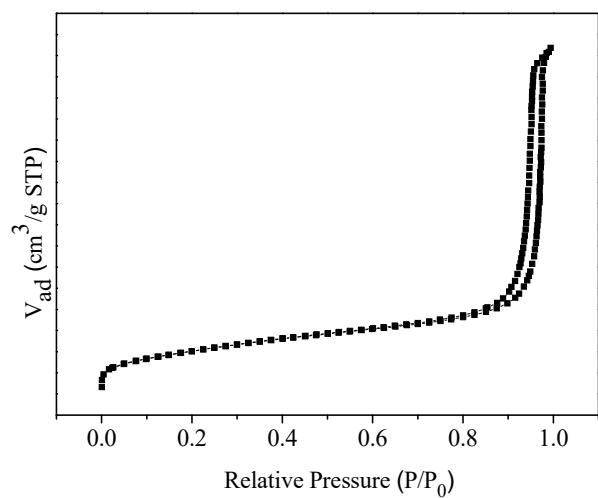

**Figure S3.** N<sub>2</sub> sorption isotherm of Pt/*m*SiO<sub>2</sub>.

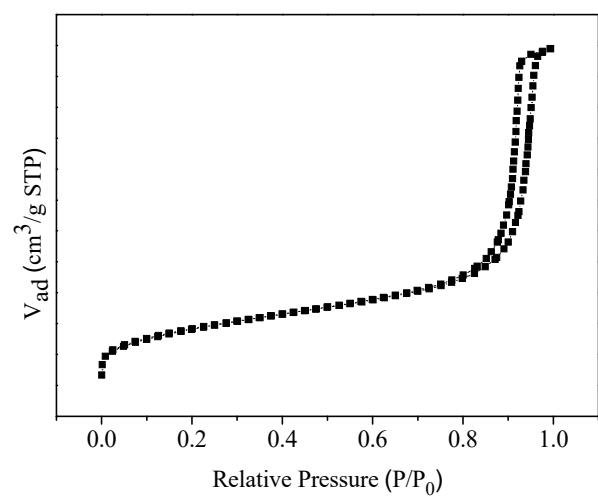

**Figure S4.** N<sub>2</sub> sorption isotherm of Ru/*m*SiO<sub>2</sub>.

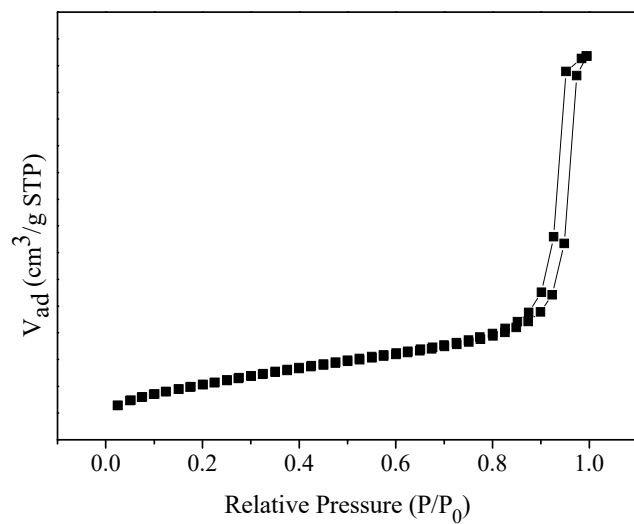

**Figure S5.** N<sub>2</sub> sorption isotherm of Rh/mSiO<sub>2</sub>.

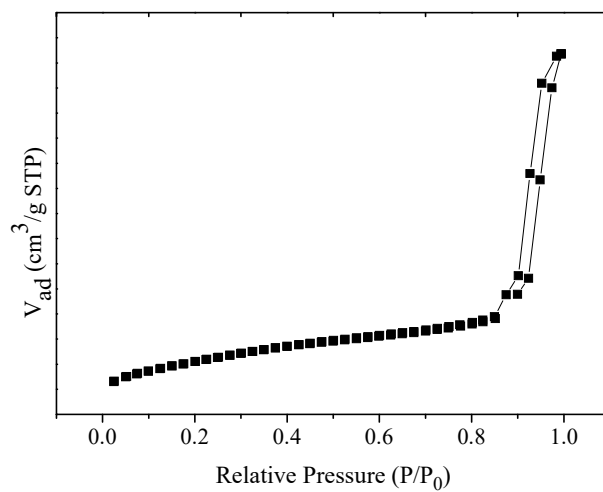

**Figure S6.** N<sub>2</sub> sorption isotherm of Pt-Ru/mSiO<sub>2</sub>.

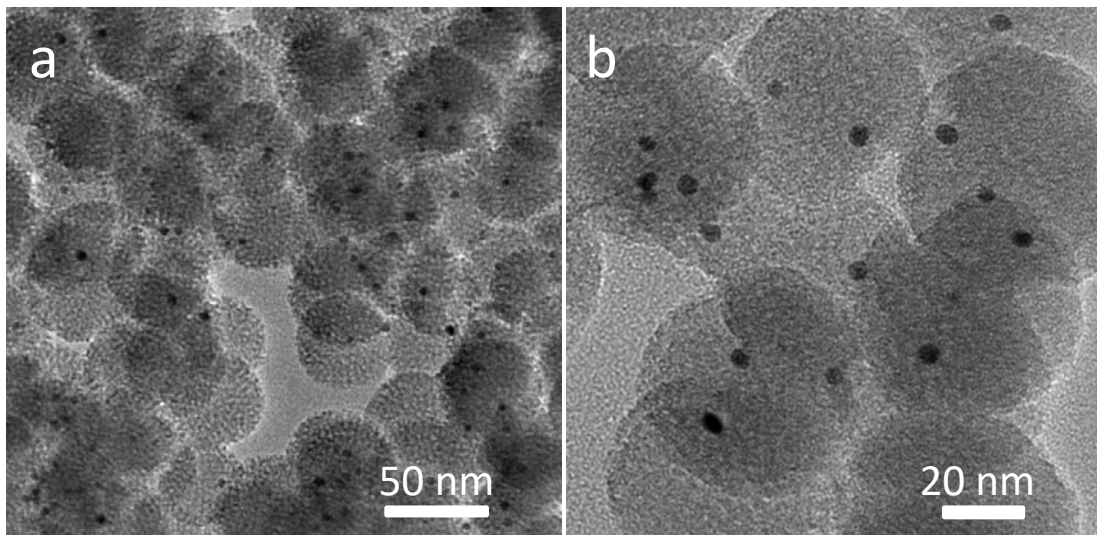

**Figure S7.** TEM images of Pt(4.4 nm)/*m*SiO<sub>2</sub> sample.

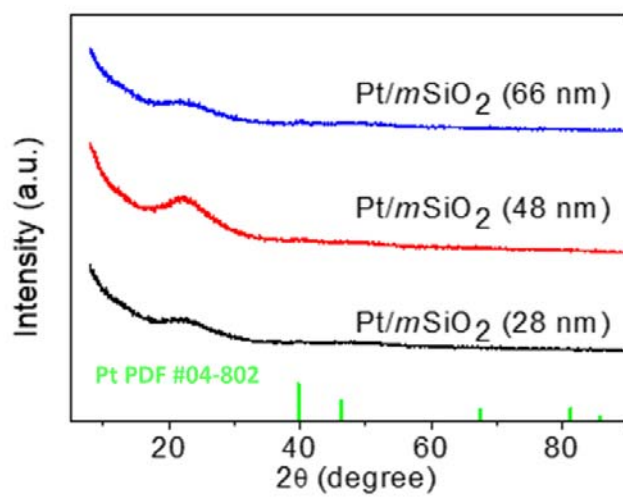

**Figure S8.** XRD patterns of the three Pt based nanocatalysts with different matrix sizes of *m*SiO<sub>2</sub>: Pt/*m*SiO<sub>2</sub> (28 nm), Pt/*m*SiO<sub>2</sub> (48 nm), and Pt/*m*SiO<sub>2</sub> (66 nm).

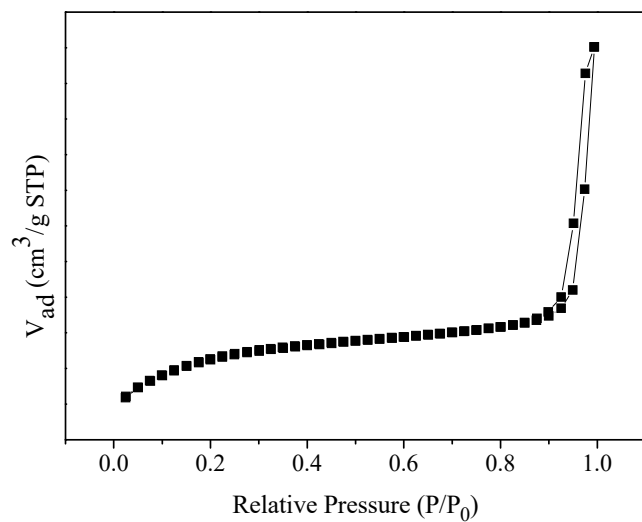

**Figure S9.** N<sub>2</sub> sorption isotherm of Pt/*m*SiO<sub>2</sub> (48 nm).

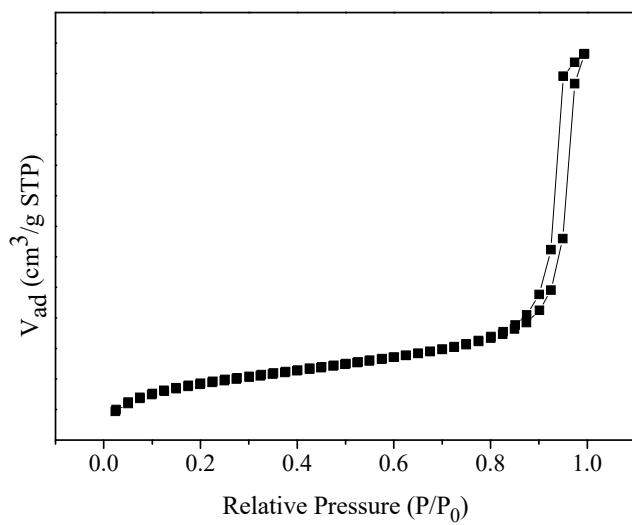

**Figure S10.** N<sub>2</sub> sorption isotherm of Pt/*m*SiO<sub>2</sub> (66 nm).



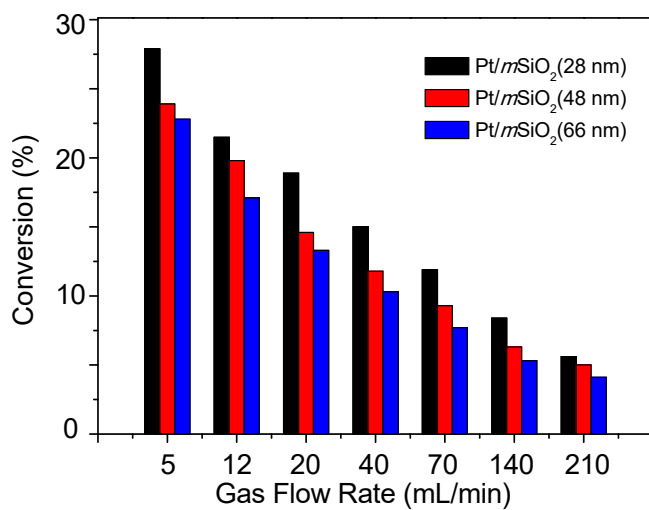

**Figure S11.** Effect of gas flow rate on the performance of the three Pt/mSiO<sub>2</sub> nanocatalysts: Pt/mSiO<sub>2</sub> (28 nm), Pt/mSiO<sub>2</sub> (48 nm), and Pt/mSiO<sub>2</sub> (66 nm).

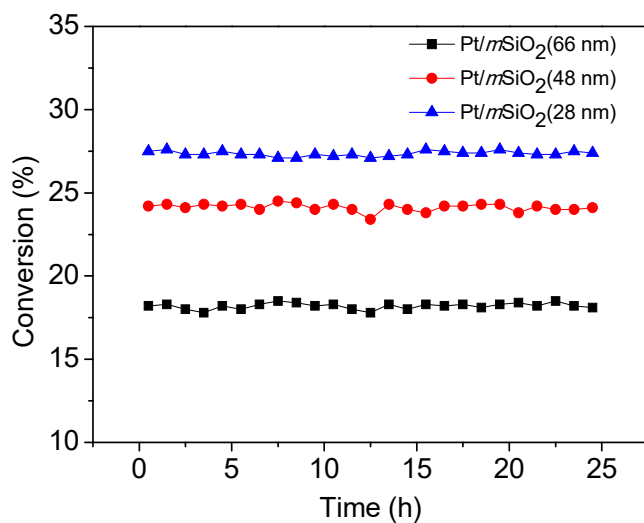

**Figure S12.** Stability tests of the three Pt/mSiO<sub>2</sub> nanocatalysts at 400 °C and 1 atm.

## Supplementary Tables

| sample                                   | Metal Content (wt%)     | BET (m <sup>2</sup> ·g <sup>-1</sup> ) |
|------------------------------------------|-------------------------|----------------------------------------|
| Pt/ <i>m</i> SiO <sub>2</sub> (28 nm)    | 1.73 %                  | 747.2                                  |
| Ru/ <i>m</i> SiO <sub>2</sub> (27 nm)    | 1.70%                   | 750.2                                  |
| Rh/ <i>m</i> SiO <sub>2</sub> (29 nm)    | 1.67%                   | 772.6                                  |
| Pt-Ru/ <i>m</i> SiO <sub>2</sub> (30 nm) | 0.84% (Pt) + 0.81% (Ru) | 745.0                                  |
| Pt/ <i>m</i> SiO <sub>2</sub> (48 nm)    | 1.75%                   | 751.2                                  |
| Pt/ <i>m</i> SiO <sub>2</sub> (66 nm)    | 1.71%                   | 754.3                                  |

**Table S1** Noble metal contents and BET specific surface areas of integrated M/*m*SiO<sub>2</sub> nanocatalysts prepared *via* this self-assembly method, where M = Pt, Ru, Rh and Pt-Ru.

| sample                                | TOF (min <sup>-1</sup> ) |
|---------------------------------------|--------------------------|
| Pt/ <i>m</i> SiO <sub>2</sub> (28 nm) | 9.8                      |
| Pt/ <i>m</i> SiO <sub>2</sub> (48 nm) | 8.6                      |
| Pt/ <i>m</i> SiO <sub>2</sub> (66 nm) | 6.1                      |

**Table S2** Comparison of TOF calculated from data achieved at 400 °C. TOF values were defined as mole of CO<sub>2</sub> converted per mole of Pt metal per minute.

## References

1. Y. Wang, J. W. Ren, K. Deng, L. L. Gui, and Y. Q. Tang, *Chem. Mater.*, 2000, **12**, 1622-1627.
2. H. S. R. M. Rioux, J. D. Hoefelmeyer, P. Yang, and G. A. Somorjai, *J. Phys. Chem. B* 2005, **109**, 2192-2202.
3. L. M. Baldyga, S. O. Blavo, C.-H. Kuo, C.-K. Tsung and J. N. Kuhn, *ACS Catal.* 2012, **2**, 2626-2629.
